A608

**TITLE:** DEXMEDETOMIDINE IMPROVES OUTCOME FROM INCOMPLETE CEREBRAL ISCHEMIA IN THE RAT  
**AUTHORS:** W.E. Hoffman, Ph.D., E. Kochs, M.D., C. Werner, M.D., R.F. Albrecht, M.D.  
**AFFILIATION:** Anes. Dept., University of Illinois-Chicago/Humana Hospital-Michael Reese, Chicago, IL 60616

The purpose of this study was to determine whether dexmedetomidine, an  $\alpha_2$ -adrenoreceptor agonist, decreases sympathetic activity and improves outcome from incomplete ischemia in the rat.

**Methods:** After institutional animal care committee approval, 45 male Sprague Dawley rats (350-450 g) were intubated and anesthetized with isoflurane. Femoral artery and vein catheters were inserted. At the end of surgery the isoflurane was replaced with an iv infusion of  $25 \mu\text{g}\cdot\text{kg}^{-1}\cdot\text{hr}^{-1}$  fentanyl and 70%  $\text{N}_2\text{O}$  ventilation in oxygen. There were four treatment groups. Group 1 (n=15) served as controls. Group 2 (n=10) received an intraperitoneal (ip) injection of  $10 \mu\text{g/kg}$  dexmedetomidine (DEXMED) 15 minutes before the start of ischemia. Group 3 (n=10) received an ip injection of  $100 \mu\text{g/kg}$  dexmedetomidine. Group 4 (n=10) received  $100 \mu\text{g/kg}$  dexmedetomidine and  $1 \text{ mg/kg}$  atipamezole (ATIPAM), an  $\alpha_2$ -adrenoreceptor antagonist. Ischemia was produced by right carotid ligation combined with hemorrhagic hypotension to 35 mmHg for 30 minutes. Arterial  $\text{PCO}_2$  and pH were maintained at control levels and skull temperature at  $37^\circ\text{C}$  during ischemia. Plasma glucose and catecholamines were measured during ischemia. After ischemia, the rats were recovered and neurologic outcome measured daily for 3 days using an 18 point scale (0 = normal, 18 = stroke related death).

**Result:** Total catecholamines (epi+norepi) during ischemia were: group 1 =  $2.33 \pm 0.24 \text{ ng/ml}$ , group 2 =  $0.57 \pm 0.17 \text{ ng/ml}$  ( $P < 0.05$ ), group 3 =  $0.21 \pm 0.07 \text{ ng/ml}$  ( $P < 0.05$ ), group 4 =  $2.50 \text{ ng/ml}$ . Neurologic outcome was improved by dexmedetomidine and this effect was reversed by atipamezole (fig 1). Neurologic outcome was correlated with plasma catecholamines ( $r = 0.67$ ,  $P < 0.05$ ) but not plasma glucose ( $r = 0.02$ ).

**Discussion:** These results show that dexmedetomidine decreases catecholamines and improves outcome from ischemia by stimulation of  $\alpha_2$ -adrenoreceptors.

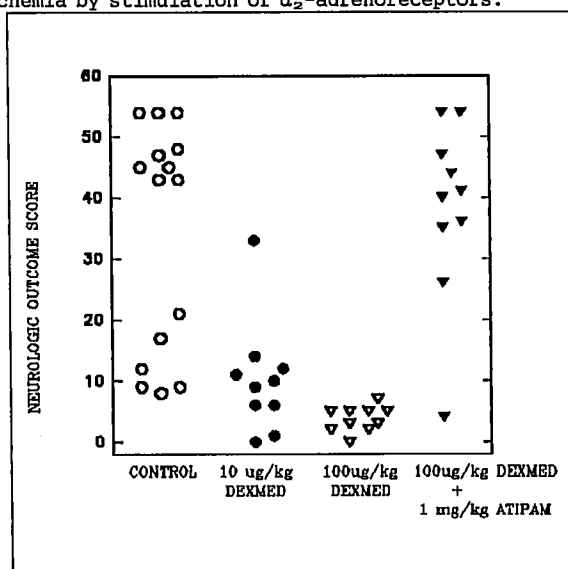

Figure 1. Total score for 3 days. DEXMED (10 and  $100 \mu\text{g/kg}$ ) improved outcome vs control ( $P < 0.05$ )

A609

**TITLE:** EFFECTS OF MK-801 ON CEREBRAL REGIONAL OXYGEN CONSUMPTION IN FOCAL CEREBRAL ISCHEMIA  
**AUTHORS:** O.Z. Chi, M.D., M. Anwar, M.D., A.K. Sinha, Ph.D., H.R. Weiss, Ph.D.  
**AFFILIATION:** Depts. of Anesthesia, Ped. & Physiol-Biophysics, UMDNJ-Robert Wood Johnson Med. Sch., New Brunswick, NJ 08903

The purpose of this investigation was to test whether MK-801, an N-methyl-D-aspartate (NMDA) receptor antagonist, would improve the balance of  $\text{O}_2$  supply and consumption in the focal ischemic area of the brain induced by occlusion of the middle cerebral artery (MCA).

Adult male long Evans rats were anesthetized with pentobarbital ( $50 \text{ mg/kg}$  ip) and the MCA was ligated. Fifteen min after MCA occlusion,  $5 \text{ mg/kg}$  of MK-801 was administered iv over 2 min to the MK-801 group (N=12) and normal saline was given to the control group (N=12). One hour after MCA occlusion in each group, the regional cerebral blood flow (rCBF) was determined in 6 rats using  $^{14}\text{C}$ -iodoantipyrine, while the regional arterial and venous  $\text{O}_2$  saturation were determined using a microspectrophotometric technique in the other 6 rats.  $\text{O}_2$  extraction and consumption were calculated from rCBF, A-V  $\text{O}_2$  saturation difference and Hb.

Blood pressure, heart rate,  $\text{PaCO}_2$ , hemoglobin concentration and temperature were not different between the two groups at the time of determination of CBF and  $\text{O}_2$  saturation. rCBF was not affected by MK-801 in all the brain regions studied including the ischemic cortex (Table 1).  $\text{O}_2$  extraction was significantly higher in the ischemic cortex than in the contralateral cortex for the control group. However for the MK-801 group, there was no significant difference between these cortices.  $\text{O}_2$  extraction in the ischemic cortex of the MK-801 group was significantly lower than that of the control group. The regional  $\text{O}_2$  extraction was not significantly different among the various non-ischemic brain regions of both the control and the MK-801 group. The distribution of venous  $\text{O}_2$  saturations in the ischemic cortex of the MK-801 group was significantly shifted toward higher  $\text{O}_2$  concentrations when compared with that of the same region in the control group. Calculated ischemic regional  $\text{O}_2$  consumption was similar to the non-ischemic values in the control group, while the ischemic value was reduced to 61% of the value of the contralateral cortex in the MK-801 group (Figure 1).

Our study demonstrated that MK-801 improved the  $\text{O}_2$  supply to consumption ratio by decreasing the  $\text{O}_2$  consumption without a significant change in the  $\text{O}_2$  supply of the ischemic region. Inhibition of the increase of  $\text{O}_2$  extraction in the ischemic cortex of the MK-801 group may be related to the ability of MK-801 to block the NMDA receptors.

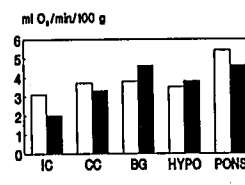

Figure 1.  $\text{O}_2$  Consumption

Table 1. Cerebral blood flow,  $\text{O}_2$  extraction and  $\text{O}_2$  supply to consumption ratio one hour after MCA occlusion (Mean  $\pm$  SD).

| Brain Region              | Group   | Blood Flow (ml/min/100g) | $\text{O}_2$ Extraction (ml $\text{O}_2$ /100 ml blood) | $\text{O}_2$ Supply to Consumption Ratio |
|---------------------------|---------|--------------------------|---------------------------------------------------------|------------------------------------------|
| Ischemic Cortex (IC)      | Control | $36 \pm 16^+$            | $8.8 \pm 2.1^+$                                         | $2.1 \pm 0.3^+$                          |
|                           | MK-801  | $33 \pm 10^+$            | $6.1 \pm 1.0^*$                                         | $2.9 \pm 0.7^*$                          |
| Contralateral Cortex (CC) | Control | $67 \pm 14$              | $5.6 \pm 0.3$                                           | $3.3 \pm 0.3$                            |
|                           | MK-801  | $58 \pm 11$              | $5.7 \pm 1.1$                                           | $3.2 \pm 0.4$                            |
| Basal Ganglia (BG)        | Control | $67 \pm 15$              | $5.6 \pm 0.5$                                           | $3.2 \pm 0.2$                            |
|                           | MK-801  | $70 \pm 23$              | $6.5 \pm 1.0$                                           | $2.8 \pm 0.6$                            |
| Hypothalamus (HYPO)       | Control | $67 \pm 14$              | $5.3 \pm 0.5$                                           | $3.4 \pm 0.6$                            |
|                           | MK-801  | $66 \pm 14$              | $5.8 \pm 1.2$                                           | $3.2 \pm 0.6$                            |
| Pons (PONS)               | Control | $84 \pm 16^+$            | $6.5 \pm 1.5$                                           | $2.9 \pm 0.7$                            |
|                           | MK-801  | $72 \pm 15$              | $6.4 \pm 1.3$                                           | $2.7 \pm 0.4$                            |

+ Significantly different from the contralateral cortex ( $p < 0.05$ ).

\* Significantly different from the control ( $p < 0.05$ ).
